# Supplementary material for: Inhibitory muscarinic acetylcholine receptors enhance aversive olfactory learning in adult Drosophila
Source: eLife journal article supplement (doi:10.7554/elife.48264), 2019-06-19
Supplement: supp [file elife-48264-supp-v1.zip]

Archive with 22 entries (22 files):
- elife_poa_e48264_Figure_4_source_data_1.csv
- elife_poa_e48264_Figure_8_source_data_1.xlsx
- elife_poa_e48264_Figure_2_figure_supplement_2.ai
- elife_poa_e48264_Figure_1_source_data_3.xlsx
- elife_poa_e48264_Figure_5_figure_supplement_1.ai
- elife_poa_e48264_Figure_5_source_data_1.csv
- elife_poa_e48264_Figure_1_figure_supplement_1.ai
- elife_poa_e48264_Figure_2_figure_supplement_1.ai
- elife_poa_e48264_Figure_7_source_data_1.xlsx
- elife_poa_e48264_Figure_6_figure_supplement_1.ai
- elife_poa_e48264_Figure_2_source_data_1.xlsx
- elife_poa_e48264_Supplementary_file_2.docx
- elife_poa_e48264_Figure_1_source_data_1.xlsx
- elife_poa_e48264_Figure_3_figure_supplement_1.ai
- elife_poa_e48264_Transparent_Reporting_File.pdf
- elife_poa_e48264_Figure_8_figure_supplement_1.ai
- elife_poa_e48264_Figure_7_figure_supplement_1.ai
- elife_poa_e48264_Figure_1_source_data_2.xlsx
- elife_poa_e48264_Figure_6_source_data_1.csv
- elife_poa_e48264_Figure_3_source_data_1.csv
- elife_poa_e48264_Figure_7_source_data_2.xlsx
- elife_poa_e48264_Supplementary_file_1.docx
