# Supplementary material for: Inhibitory muscarinic acetylcholine receptors enhance aversive olfactory learning in adult Drosophila
Source: eLife journal article supplement (doi:10.7554/elife.48264), 2019-06-19
Supplement: supp [file elife-48264-supp-v1.zip › elife_poa_e48264_Figure_1_source_data_1.xlsx]

## Sheet: Sheet1
experiment 1:
			DM1				EF1					normalize to GAL4 parent
						average				average	deltaCT	ddCT	RQ
	1	ELAV	26.0721	25.9604	25.8906	25.9744	21.9724	22.1422	22.4539	22.1895	3.78488	0.156359	0.897287
	2	ELAV 38765	26.9473	26.8305	26.9631	26.9136	23.323	23.5573	23.5711	23.4838	3.42978	-0.198743	1.1477
	3	V20	25.9656	25.7021	25.9529	25.8735	22.399	21.9937	22.4213	22.2714	3.60217	-0.0263552	1.01844
	4	ELAV V20	27.1689	27.0107	27.1796	27.1197	21.8814	22.1369	22.2141	22.0774	5.0423	1.41377	0.375328
	5	VDRC DCR	26.2006	26.1526	26.3008	26.218	22.9382	22.9685	22.9208	22.9425	3.27552	-0.353005	1.27722
	6	ELAV VDRC DCR	27.2027	27.5362	27.3798	27.3729	22.0042	22.0116	22.0588	22.0248	5.34808	1.71955	0.303643
experiment 2:
			DM1				EF1										elav average
						average				average	deltaCT	ddCT	RQ				3.62852
	1	ELAV	26.8395	26.6086	26.5149	26.6543	22.6207	22.8157	22.5985	22.6783	3.97604	0.347513	0.785938
	3	V20	27.3996	27.4499	27.5508	27.4668	23.0484	23.0662	23.2763	23.1303	4.33648	0.707956	0.612187
	4	ELAV V20	29.407	29.6143	29.6163	29.5458	23.8051	23.3693	23.7117	23.6287	5.91715	2.28863	0.20467
	5	VDRC DCR	26.0999	26.083	26.2233	26.1354	22.2736	22.4376	22.0272	22.2461	3.88926	0.26074	0.83466
	6	ELAV VDRC DCR	28.2009	28.3491	28.2706	28.2735	22.4973	22.3912	22.3698	22.4194	5.85412	2.22559	0.213811
	9	MIMIC DM1	26.8752	26.5071	26.6665	26.6829	22.4327	22.6413	22.4059	22.4933	4.18965	0.561128	0.677772
experiment 3:
			DM1				EF1
						average				average	deltaCT	ddCT	RQ
	1	ELAV-gal4	30.5105	30.9562	30.2144	30.5604	27.7006	27.58	27.4373	27.5726	2.98773	-0.640792	1.55919
	2	V20 parents	31.3798	31.2218	31.2711	31.2909	27.7506	28.0179	28.058	27.9422	3.3487	-0.279821	1.21404
	3	ELAV V20	32.3022	32.2873	32.4707	32.3534	28.6783	28.6797	28.2139	28.5239	3.82946	0.200932	0.869988
	4	VDRC parents	31.0021	30.6069	30.7618	30.7903	27.7473	27.9633	27.544	27.7515	3.03871	-0.58981	1.50505
	5	ELAV VDRC	31.9774	31.9797	31.6804	31.8791	27.3855	27.6447	27.3163	27.4488	4.43033	0.801802	0.573632
	6	W1118	28.6542	28.3814	28.7955	28.6103	25.114	25.0855	25.425	25.2082	3.40215	-0.226369	1.16989
	7	MIMIC 59216	33.6654	33.6784	34.0019	33.7819	25.9621	25.9737	25.7575	25.8978	7.88413	4.2556	0.0523523
experiment 4:
			DM1				EF1
						average				average	deltaCT	ddCT	RQ
	1	ELAV-gal4	26.9414	26.9312	26.7729	26.8818	22.7766	22.9607	22.4152	22.7175	4.16437	0.535847	0.689754
	2	V20 parents	28.0168	28.225	27.9463	28.0627	23.4241	23.2704	23.2735	23.3227	4.74001	1.11149	0.462817
	3	ELAV V20	28.4882	28.4385	28.5907	28.5058	22.7061	22.694	22.7937	22.7313	5.77456	2.14604	0.225933
experiment 5:
			DM1				EF1
						average				average	deltaCT	ddCT	RQ
	1	ELAV-gal4 1	25.9988	26.2576	25.9176	26.058	22.1121	21.9613	22.0772	22.0502	4.00784	0.379314	0.768803
	2	ELAV-gal4 2	26.4604	25.8135	25.7403	26.0048	22.2715	22.6131	22.3174	22.4007	3.60408	-0.0244472	1.01709
	3	V20 parents 1	26.5036	27.2384	26.547	26.763	22.566	23.3964	22.9743	22.9789	3.7841	0.155572	0.897777
	4	V20 parents 2	26.6507	26.0857	26.771	26.5025	22.5466	22.3161	22.9585	22.6071	3.89539	0.26687	0.831121
	5	ELAV V20 1	27.218	26.9451	26.9645	27.0425	21.8921	22.1793	22.3747	22.1487	4.8938	1.26527	0.41602
	6	ELAV V20 2	27.6188	27.9049	27.6694	27.731	22.362	22.3358	22.8979	22.5319	5.1991	1.57057	0.336675
experiment 6: (feb)
			DM1				EF1
						average				average	deltaCT	ddCT	RQ
	1	ELAV	25.7675	25.5878	25.7247	25.6934	22.7433	22.8011	22.9114	22.8186	2.87473	-0.753793	1.68622
	2	W1118	25.4879	25.4096	25.4768	25.4581	22.29	22.2827	22.3212	22.298	3.16014	-0.468387	1.38356
	3	V20	25.745	26.1857	25.9784	25.9697	22.9627	22.8962	23.0129	22.9573	3.01246	-0.616059	1.53268
	4	ELAV V20	28.7755	29.0444	28.7631	28.861	23.7232	23.6801	23.7567	23.72	5.14099	1.51247	0.350511
	5	VDRC DCR	25.3152	25.3041	25.107	25.2421	22.2533	22.1556	22.3655	22.2581	2.98399	-0.644536	1.56324
	6	ELAV VDRC DCR	27.1657	27.1829	27.0919	27.1468	22.8721	22.9475	22.765	22.8616	4.28528	0.656752	0.634305
