# Supplementary material for: Inhibitory muscarinic acetylcholine receptors enhance aversive olfactory learning in adult Drosophila
Source: eLife journal article supplement (doi:10.7554/elife.48264), 2019-06-19
Supplement: supp [file elife-48264-supp-v1.zip › elife_poa_e48264_Figure_1_source_data_2.xlsx]

## Sheet: learning
		OK107	RNAi1	OK107>RNAi 1	RNAi 2	OK107>RNAi 2	OK107	RNAi1	OK107>RNAi 1	RNAi 2	OK107>RNAi 2	OK107,GAL80ts	RNAi1	OK107,GAL80ts>RNAi 1	OK107,GAL80ts>RNAi 1
		against MCH					against OCT					against MCH
												31 c	31 c	31 c	23 c
preference in general		38.3762	44.8634	16.0523	39.5987	16.4829	36.6894	39.5048	13.8447	35.1727	11.4129	47.2759	54.5548	25.6825	44.5746
Average		-38.3762	-44.8634	-16.0523	-39.5987	-16.4829	-36.6894	-39.5048	-13.8447	-35.1727	-11.4129	-47.2759	-54.5548	-25.6825	-44.5746
STD		40.981	49.742	39.6843	39.2561	40.6683	38.5817	43.356	44.5758	43.164	45.1147	40.7539	25.9845	22.7509	29.9664
COUNT		69	69	70	71	71	47	48	53	58	51	51	41	58	51
		-26.8414	-12.8674	25	-19.6581	-63.6236	-43.7203	-48.1176	5.9553	-27.9472	49.9739	2.5149	-93.047	-23.6622	-54.9971
		-43.4819	-39.3727	-66.6667	-66.6667	-63.2992	-70.0874	-37.0215	50.2791	-44.3616	12.9516	-97.6464	-9.7247	-53.9954	-13.366
		-6.2063	0.1546	-80	-25	16.0425	-62.971	-61.0939	-4.8136	-25.9684	43.9617	-3.9275	-69.7714	-11.5702	-89.3281
		-10.5121	0	-100	-14.2857	22.2268	-79.5323	-99.944	-51.6842	14.8141	-66.6085	-32.4273	-81.0579	26.4019	-82.7492
		-14.3688	-51.539	0	-15.3846	-48.7562	-32.5014	-99.5447	31.2045	-99.7466	-65.0685	-95.8966	-99.6473	-42.5692	-89.926
		-6.8822	-100	-17.4825	-26.1905	18.9627	-80.3545	-92.2395	-0.9389	52.9059	-64.395	-69.8127	-96.4159	-71.1119	-81.67
		-15.1319	-35.6407	-50	-44.4444	-35.6252	-62.6373	-0.7893	3.4619	-57.9753	3.6414	-95.5279	-43.3385	-25.6038	-57.6852
		-46.4211	-89.1627	-65.7143	-41.6667	-78.3724	-37.34	-76.6684	0.0524	-55.3326	-52.8886	-56.6509	-89.5519	-26.4037	-21.2785
		-12.5063	-59.7046	-28.2828	-87.5	-7.381	-70.0981	18.5228	-57.5534	42.6469	59.1222	-13.4968	-92.164	-54.3533	-52.1946
		-9.5937	-68.8879	-65.7143	-100	-20.8934	-0.0472	-22.7964	16.0881	21.9279	-0.5874	-68.8891	-50.755	21.6242	-75.9868
		-31.6503	67.6952	-25	-54.1667	-83.7112	-65.9681	-24.5722	62.0366	-63.1225	-43.7791	-30.9131	-80.672	-47.108	-61.3917
		-6.07	-99.9708	-50	-25	-32.7531	15.2388	-82.8805	59.7425	-39.6964	62.7006	-86.8491	-38.0612	-19.8488	-35.0321
		-7.9886	-89.8943	0	-9.7222	-7.92	-30.0823	0.4724	-50.3196	-70.501	52.2323	-89.634	-38.9188	-0.848	-94.0819
		-18.672	-86.2263	-50	-26.1905	6.7961	-48.0416	-93.1849	3.4856	9.6007	-37.405	-94.955	-58.5643	-5.9784	-23.813
		-9.303	-87.2719	-75	-37.5	-19.3486	6.7873	65.5059	72.0789	-70.1564	67.8936	13.7025	-26.5212	-26.7022	-95.039
		-21.4841	-77.6342	60	-40	9.2473	26.7803	-3.8325	-58.2133	-58.0577	-57.3872	-89.8658	-43.6467	-29.1088	-8.706
		-17.1674	-58.6377	20	-40	13.3024	14.5864	28.7104	-92.1128	-81.1912	48.7567	-55.3159	-79.6828	-31.8375	-73.3867
		1.4334	-58.3882	-50	-38.1108	-35.4603	46.0378	-100	-8.7277	-55.5349	20.3567	-75.1991	-57.8153	-16.1753	-4.2837
		-38.1421	-48.5981	-26.1364	-92.0405	7.9415	-74.7299	-68.6475	-63.087	-29.6736	9.8516	0.7807	-19.2592	-66.7654	-49.2389
		-91.942	-89.8737	16.6667	11.1111	69.2365	-12.9123	-100	-24.9953	-44.7085	-21.0453	37.2058	-50.024	3.096	-75.1765
		-0.5163	0.6585	-4.1667	-80	-33.7812	-59.6852	-1.1012	-21.1218	-70.0691	-12.3778	11.8244	-36.8229	-39.3308	-43.8134
		-95.8657	-100	10	-100	-61.8427	-21.6384	-89.7199	82.1917	39.0235	5.4431	-20.056	-20.226	-37.4515	-68.8756
		-92.8057	-20.9728	10.101	0	-35.7584	-33.313	-62.9162	-78.2355	-33.5488	-84.1922	-84.7668	-54.2841	-37.5187	-81.0543
		-71.1162	-43.5073	20.2797	-100	38.1368	22.1039	0.321	4.0831	-29.0932	-4.0029	-77.6136	-32.263	-20.1475	-21.2201
		-78.9441	1.6235	-19.6429	-73.2143	23.0045	-83.7594	-100	-12.9799	-36.3355	-61.553	-91.3696	-16.2858	-8.5744	13.296
		-90.1154	-91.2516	-50	-16.6667	15.8793	-73.7582	-8.9038	-35.109	19.0251	18.9903	-36.5391	-36.5312	-37.9613	-38.9077
		-73.2364	-74.9091	80	-77.7778	-21.0069	-90.1876	36.7097	-18.6689	1.7406	-11.2657	-39.9929	-33.2448	-30.3092	-0.3837
		-85.8855	-36.939	-21.5385	-67.7778	16.2486	-9.4655	-29.2243	-25.2946	-35.2672	0	-2.5941	-48.0787	-45.6703	-64.6791
		-24.0871	19.4359	-50	-81.8182	35.2953	-18.6943	-11.9005	-95.4442	-8.1373	-8.9914	-74.5748	-60.2613	-15.4168	-66.7024
		26.8533	-91.4385	-50	-66.6667	-39.1841	-62.1779	-26.1137	-1.1158	-75.0667	-4.7282	-82.9463	-58.3887	35.0441	-33.6318
		-82.8311	-99.3886	-19.8718	-37.5	-23.3734	-80.3991	2.9406	0.0346	-71.6251	-77.2069	-68.4772	-49.43	-35.4138	-20.1489
		-58.5269	25.8601	-14.2857	40	-32.7132	-78.2336	17.3703	0	-3.4548	-6.416	-45.0713	-39.8069	-56.1589	-1.8914
		-34.7132	-26.4311	0	-75	-39.5865	-74.1299	-59.9198	-33.7576	-87.3754	-12.7046	-58.6188	-64.391	-39.5046	-60.2621
		-45.3544	29.1768	-20	-57.1429	-26.8543	-31.7903	-85.5044	-15.5191	-100	-3.4811	3.5764	-46.0543	-34.8372	-4.1873
		-98.6244	96.1492	-16.6667	-37.5	-10.0399	-62.0332	-56.9277	33.699	9.9621	45.9629	-69.5926	-64.2409	-63.4564	-76.7598
		-61.2173	-81.7342	-38.6364	-41.6667	-19.1985	-45.8281	-55.323	-57.9491	-27.1257	-84.8694	-46.7349	-99.725	-23.0984	-45.7202
		-96.7074	86.3645	-57.1429	-100	-95.8201	-54.5097	-8.1593	-11.8706	-26.5437	3.2064	29.6846	-78.579	-21.6884	-94.8036
		-74.7524	-100	50	-57.1429	-13.5814	-5.5472	-17.6493	-75.8313	-21.1981	-99.6342	-60.9735	-81.9966	-41.1195	-2.6461
		-35.0005	0.9319	25	-88.8889	-100	14.2952	-44.1576	74.7871	-96.2038	-32.5623	-92.9262	-29.8684	-1.7866	-62.6925
		-98.0379	-100	-62.3077	-37.7778	3.2751	-2.0304	-84.8196	23.6272	-93.23	-62.7854	17.9651	0.2437	-28.9066	-21.4287
		-83.7148	3.7256	25.974	-16.6667	-11.7583	48.7529	0.3792	-80.0745	-22.5917	-80.1836	25.2304	-67.8738	-0.0668	-35.0945
		34.7568	10.6858	-12.1212	-100	-96.4252	-78.6892	-81.1536	-47.5649	15.1303	-14.6739	-93.047		-39.6192	-2.5924
		-27.204	-100	-37.1429	-80	-86.1722	-3.9898	1.8286	-73.5961	6.671	8.426	-9.7247		-31.0636	-40.2529
		3.451	-22.6344	-0.9615	21.6783	-3.9705	-13.3692	-70.9176	-44.046	-90.696	24.5855	-29.7714		-31.0878	-54.6144
		-60.6709	2.5307	-50	16.6667	-37.0656	-64.1371	-47.7631	-46.5647	-98.121	-97.3214	-81.0579		-14.3131	-21.4108
		-3.9212	-12.6634	-12.8205	0	-47.6067	-92.2969	-10.847	-76.2247	31.5972	-31.8215	6.7866		-3.1514	-67.2315
		23.2887	-91.5427	40	-22.2222	14.2284	-8.2957	-13.2588	-40.9383	-5.1915	-0.8763	-99.6473		-24.9356	-19.8855
		22.0768	-97.8453	0	15	-15.2528		-91.3795	-6.9903	-100	1.6734	-96.4159		-3.5951	-24.0927
		-0.5669	-94.5457	-40	2.7778	0.3093			51.8933	-18.3715	15.4916	-43.3385		-43.7769	-22.5995
		-12.7961	-60.0729	5.3571	-3.8961	-16.8375			-6.5925	19.2079	6.1187	-38.9188		-25.6896	-19.4497
		-86.4148	-100	0	14.2857	-3.7572			-17.1245	-82.3994	57.4118	-58.5643		-14.445	-30.235
		-78.418	38.3353	40	-20.8333	58.9721			6.8947	-43.2331				-27.2082
		-88.3043	-0.8407	-66.6667	-61.4286	-100			19.6956	30.4128				-57.2058
		3.8115	-97.2967	34.6154	-83.3333	-67.4616				1.0006				-67.4347
		35.1401	-61.0845	-66.6667	-71.4286	-38.7036				-23.3642				-25.3586
		-8.3587	-9.4061	-25	-9.2308	50.4976				-33.4691				2.3186
		2.0395	-14.6162	25	25.7143	-50.7191				-100				4.5004
		-4.4337	10.4173	-60	-23.2323	57.1857				-100				-1.6273
		12.3806	-19.791	-57.1429	-14.2857	-24.9039
		-99.81	-12.0537	21.4286	1.7857	15.5888
		2.025	-97.5706	50	11.5385	19.3374
		1.4334	-38.9393	-46.9697	-100	-30.4809
		-98.1421	-69.433	22.2222	11.1111	-44.3639
		-91.942	-32.9353	-22.2222	31.1111	13.0669
		-0.5163	-72.1571	0	-80	-48.2001
		-95.8657	-79.3182	8.3333	-100	87.6997
		-92.8057	-93.4863	25	0	0.8655
		-71.1162	-99.2055	33.3333	-100	1.3551
		-78.9441	-91.6412	-100	-73.2143	-33.6497
				0	-16.6667	17.7954
					-37.7778	4.4314

## Sheet: valence
		OK107	RNAi1	OK107>RNAi 1	OK107	RNAi1	OK107>RNAi 1
		OCT			MCH
preference in general		24.534	32.3184	27.0142	44.967	38.5798	38.3326
Average		-24.534	-32.3184	-27.0142	-44.967	-38.5798	-38.3326
STD		29.5169	42.6602	24.4768	29.0218	37.446	28.6896
COUNT		68	67	58	63	91	67
		-70.365	-66.6667	-27.2727	-48.8475	-54.8167	-23.9316
		-3.5746	-80	-46.5388	-43.4791	-38.8417	-15.5556
		-6.8664	-62.5	-44.7873	-74.7237	-38.5805	-18.0556
		-46.0953	-66.6667	26.6889	-68.19	-37.4582	-31.7308
		-37.753	-87.5	-39.5329	-62.9677	-47.8553	0
		-69.6674	-48.8889	-8.8407	12.2426	-98.6569	-36.1111
		-27.0002	0	-15.5129	-59.2669	-57.2107	-10
		4.1444	-33.3333	-31.0259	-4.4058	-50.0896	-12.5
		-24.926	-100	-27.8565	-52.9988	-20.5191	-100
		-45.0206	-50	-8.4237	-44.3492	-65.4896	-25
		-20.0813	-71.4286	-52.2102	-73.876	-27.1974	-30.3419
		-31.9075	-20.5128	-39.4495	-67.3208	-70.4781	-8.3916
		-25.0561	-10.084	-11.6764	-65.9741	-83.8714	-12.1212
		-0.8429	-50	5.9216	-66.6621	-83.8723	-33.3333
		-0.9093	35	-86.5833	-32.0504	-39.5133	-6.6667
		-54.8399	50	-50.0585	-74.2415	-82.1764	-28.75
		2.1677	-26.6667	-60.412	-43.6937	-85.9434	-29.1667
		-51.3156	-13.8889	-21.0476	-71.2583	-7.7613	-16.6667
		63.5807	-50	-40.6539	-66.4527	-52.4685	-20
		-32.7761	25	3.7098	-36.0975	-44.414	-62.5
		-38.7972	0	-39.2406	-73.979	-79.6063	-25
		-77.781	-25	-58.9035	-46.4644	-34.5527	-7.1429
		-28.7042	10	-84.5714	-43.4306	-30.2387	-37.7778
		-78.0402	40	-64.6403	-75.6613	-56.8188	0.5128
		-43.5966	-10	-48.5588	-59.8966	-59.554	-25
		-32.6957	50	-42.1425	-17.3117	-26.3402	-60.4167
		-64.3068	-100	-13.8957	-69.6132	-47.1623	-100
		-5.4835	50	-2.3777	-85.1809	-39.5748	-70.8333
		1.2423	-83.3333	3.7068	-51.2286	-35.5528	-60
		-71.6244	10	14.8048	12.3663	54.3716	-46.6667
		-29.8889	-10	-44.2331	-45.852	-67.1435	-27.1429
		-31.2838	20	-44.2289	-44.1983	-65.4008	-42.8571
		-24.6831	-9.7403	-32.3123	-65.7701	-46.6367	-69.0476
		-36.811	-40	-29.9595	-43.6636	-25.5046	-87.5
		-3.1565	23.8095	-66.4057	-67.9844	-16.2853	3.7879
		-41.8527	13.3333	-37.6505	23.2379	24.4656	-55.5556
		45.8482	50	-18.3942	37.0389	72.6258	-55
		-35.4332	-8.3333	-47.4932	-95.916	-63.2496	-61.1111
		-15.4805	-60	-2.6226	-73.7922	-84.791	-45.7143
		-33.7301	-100	-4.4614	-62.5827	-77.3201	-16.6667
		-49.7354	-3.3333	-5.8832	-54.4518	-54.4946	-16.6667
		-5.8812	-87.5	-1.5498	-20.15	-20.2611	-50
		-70.1105	-16.6667	-18.0483	-35.0166	9.9667	-30.303
		-18.0919	-50	-25.0568	-79.3454	-13.1934	-100
		-39.6094	-25	-20.4124	-51.0106	-6.3781	-75.7143
		-10.7068	-83.3333	0.7125	-45.0532	0.8655	-81.8182
		-44.7889	-85.7143	-2.4547	-30.2453	-18.6927	-10
		16.5872	-33.3333	-43.8044	-21.2379	61.8867	-10.989
		-38.6916	-100	-55.7143	-70.0612	-21.6543	-57.1429
		-32.405	-33.3333	0	-46.3202	18.5571	-100
		39.4848	-75	-22.2222	-70.7808	-66.443	-40
		-21.5055	-55.5556	-5.5556	-43.4971	-26.5152	-57.1429
		-27.3458	-28.5714	-17.1429	-11.8556	-83.0161	17.1429
		0.7886	-66.6667	-38.6364	-37.5588	-19.4036	-2.5974
		-3.2986	-75	-21.2121	-52.2367	-3.532	-25
		-4.8072	-100	-50	-58.0998	18.5642	-55
		-18.7626	-66.6667	3.8462	-37.8805	5.9263	-100
		26.9094	-54.7619	-4.5455	-20.3574	-12.5851	-42.4929
		-47.2944	-100		-42.7417	1.4312	-25.5609
		-2.234	-25		19.1981	-34.096	-23.1381
		-0.6185	-38.0952		29.8191	-10.7318	-49.111
		15.5967	-7.1429		-25.1178	-62.4739	-16.5434
		0	-3.8462		-34.4234	-81.4445	-36.5706
		-17.1429	-30.5556			-100	-39.0362
		-26.1905	-7.1429			1.0914	-21.1236
		-75	-5.7143			-70.3326	-86.9852
		-71.4286	0			28.1179	-22.5377
		-16.6667				-58.0886
						-41.1557
						-84.2752
						-93.5823
						-19.0573
						-89.7868
						-4.599
						-46.9894
						-76.945
						-59.8696
						-72.6564
						-80.3895
						-94.4282
						-85.0933
						-56.5469
						-87.7709
						-0.256
						-36.3252
						-20.2013
						-27.263
						-24.3055
						-16.6934
						14.4775
						1.3594
