# Supplementary material for: Inhibitory muscarinic acetylcholine receptors enhance aversive olfactory learning in adult Drosophila
Source: eLife journal article supplement (doi:10.7554/elife.48264), 2019-06-19
Supplement: supp [file elife-48264-supp-v1.zip › elife_poa_e48264_Figure_1_source_data_3.xlsx]

## Sheet: learning
		OK107	RNAi1	OK107>RNAi 1	OK107	RNAi1	OK107>RNAi 1	107 no shock diff	107 shock diff	rna1 no shock diff	rna1 shock diff	107 rna1 no shock diff	107 rna1 shock diff
		no shock			90V			walking speed
preference in general		3.60318	6.46458	4.50728	54.6821	44.7621	58.3691	13.481	36.7716	4.83258	52.3883	10.0423	26.9542
Average		3.60318	-6.46458	-4.50728	-54.6821	-44.7621	-58.3691	13.481	36.7716	-4.83258	52.3883	10.0423	26.9542
STD		37.0476	59.8899	38.7606	35.5549	33.5121	30.0927	22.4415	55.3442	25.7183	53.9836	30.3974	47.6356
COUNT		79	73	71	52	46	51	72	100	80	80	140	160
		10.2633	76.9852	-68.8627	-49.1498	-98.7425	-97.1138	26.8848	36.4884	10.0008	-2.3856	-49.3644	-38.004
		15.85	-0.0118	-3.5503	-97.1485	-66.1173	-12.0245	30.6168	1.5708	1.4496	-43.6764	125.49	-27.1308
		0	-1.9888	-8.6118	-77.6241	-52.4325	-14.0473	22.1148	26.7696	1.9524	-10.62	-16.8036	-5.388
		2.6348	1.3654	30.8153	-46.3342	-68.8532	-55.0527	0.3528	115.884	-62.382	131.351	154.912	73.8168
		-56.7892	69.0738	-26.8967	-83.8795	-89.3139	-68.8259	-5.3616	-1.5408	-18.0744	-41.7696	11.6388	-26.2416
		4.7048	70.469	-3.9266	-61.9092	-40.1386	-96.5182	13.9212	-35.592	5.0592	93.7932	44.5308	-96.9432
		3.9564	-21.4682	-5.1862	-11.414	-72.2425	-54.3116	-22.6812	-65.1072	4.2204	101.188	17.5464	-22.9992
		11.6909	1.8608	15.0074	-100	-94.0042	-68.4466	18.2736	5.8968	1.6116	88.2852	42.3864	41.334
		-36.9287	-100	-43.4288	-100	-3.5141	-71.9029	19.6068	11.4372	-24.5784	150.889	56.0676	117.737
		99.5806	100	3.5822	-98.8718	-97.2432	-72.6937	26.664	-17.1792	-58.4064	94.3416	-26.7444	-3.75
		-9.6648	0.1298	-60.3543	-96.6057	-28.1296	-29.9702	26.0424	-0.9804	-39.2124	-34.4964	2.9976	0
		75.8221	22.4178	-36.4318	-99.9196	-26.7774	-58.4087	-0.66	53.7048	-32.5812	94.2756	-12.4908	126.431
		-88.8108	1.4909	59.6177	-35.9924	-2.5835	17.4472	30.3996	-27.24	-9.7416	112.205	16.35	71.01
		59.4663	-98.1729	21.8936	-99.93	-26.2482	-46.4195	35.5416	152.447	-35.94	12.102	30.2556	43.6776
		2.9897	-70.3084	3.2944	-95.71	2.6433	-95.683	52.2012	13.038	78.7152	64.9716	83.4612	61.1112
		-9.067	-37.7738	-47.6407	-84.5258	-25.1202	-94.662	-19.1076	4.8996	-32.0412	-26.3712	20.07	48.9036
		3.1361	-8.2284	-50.2751	7.2745	-22.0555	-70.148	-7.422	-1.1028	-3.3252	-5.7588	4.8444	44.6652
		0	0.1399	25.8719	-97.3328	-100	-100	6.6588	33.8556	14.9424	67.8444	57.594	115.002
		-4.8976	-63.882	20.215	-100	-21.4336	-46.3867	34.596	11.9232	-29.6328	85.5192	38.982	67.8924
		4.8994	0	-45.3064	-71.4301	-26.0298	-52.58	17.6112	11.982	-58.902	14.3664	16.638	36.2004
		-7.3407	-81.6953	-24.6814	-78.856	-19.0222	-7.9109	-4.134	35.0544	12.618	120.172	0	27.5532
		-4.6166	85.4193	4.6064	-92.4707	-81.5239	-90.9772	43.3296	0.39	0.1644	173.587	36.6468	-30.9492
		-47.1376	-30.6713	-11.5363	-8.2081	-1.1557	-21.317	32.1648	52.2252	-6.1608	58.9908	40.9788	33.6996
		0	-15.7002	42.9757	-100	-92.6916	-4.4717	41.3388	-18.1848	-5.7552	137.479	-73.9152	16.5348
		-9.385	-20.6336	1.68	-89.3735	-79.6793	-93.4076	6.6084	43.8756	-0.3468	-71.238	0	-5.184
		-76.1865	65.6921	15.683	14.5965	-91.9996	-37.606	33.534	74.526	6.0348	75.0444	0	-80.9028
		-55.6589	-79.1106	22.123	-40.5112	-64.2582	-15.1774	-6.1752	89.184	-8.2644	65.5344	0	84.63
		-62.3536	-49.4594	33.734	-71.6179	-88.8362	-62.8493	36.4248	132.655	11.3808	108.118	0	-68.1996
		-81.2182	100	-3.7826	-53.9391	-8.8586	-82.143	-24.42	196.553	-16.974	109.547	0	2.4648
		-45.852	-18.0013	-39.7139	-48.219	-31.1659	-51.3726	19.5756	45.984	-12.0408	216.672	0	28.608
		19.1495	62.6318	22.2081	-46.5757	-10.6802	-64.038	2.4732	33.3312	8.0952	18.6852	47.4096	-74.322
		17.0195	-5.8077	-32.8082	-100	-41.0572	-30.9773	32.1048	-30.4452	-10.944	88.8072	58.2816	11.5572
		7.6686	63.5954	-14.2645	-20.1059	-50.1991	-85.2001	1.7736	60.3504	-10.4316	160.099	-23.6664	-12.69
		45.4745	-18.9009	25.2633	-15.132	-52.8369	-93.0752	43.7412	54.0012	0.1956	43.6608	20.7912	95.8416
		34.2863	67.8304	18.2409	-80.71	-55.3766	-70.2753	23.4408	68.388	-11.9136	160.492	-1.2828	-7.3368
		8.4462	91.2637	3.4056	-10.2802	-45.6531	-24.1737	62.898	-28.7148	0.5304	149.137	42.9936	0.204
		22.2302	-5.943	73.5588	-35.2728	-19.6198	-27.4061	7.908	57.6144	-0.6708	6.276	-29.3016	48.918
		-9.0982	-70.3084	77.6615	-23.1043	-33.7094	-51.5012	46.29	-21.7464	-7.0176	130.478	-45.2544	-12.3096
		-4.9856	-37.7738	-12.4285	-32.7974	35.6893	-88.8754	-36.1944	32.7996	8.8656	28.6296	39.006	-4.4676
		41.2045	-8.2284	33.5807	-13.4136	2.6236	-80.8005	57.2232	89.6148	4.6308	116.64	-48.5448	-0.8004
		-13.457	0.1399	2.2531	-54.414	-46.3271	-44.9524	-32.286	11.0244	10.0008	35.9112	-6.5328	22.3644
		8.3468	-63.882	8.9286	-35.7523	-3.6703	-96.2111	22.5276	-11.922	1.4496	53.3928	0	13.3644
		-34.1781	0	-28.1351	-91.999	-45.8304	-82.131	25.9656	3.4668	1.9524	46.4868	2.4336	52.9848
		-20.8698	-82.7651	27.6306	-11.8684	-66.9433	-49.1445	55.7244	-14.5116	-62.382	50.8044	0	42.8556
		-8.4309	-81.6953	25.1399	-37.6705	-68.1248	-87.9252	-28.278	-18.042	-18.0744	23.5272	28.4472	35.8368
		49.813	85.4193	21.0321	-20.5427	-39.8118	-45.6879	52.4148	9.8784	5.0592	48.48	13.2852	19.3416
		36.4542	-30.6713	-10.9693	-16.5996		-45.4046	13.854	43.242	4.2204	56.0496	-83.2536	11.0208
		-16.5618	-24.8647	-72.8522	-9.0602		-50.7143	1.4316	13.0764	1.6116	36.0948	-54.8676	51.4332
		42.2513	-74.1763	-6.6513	-19.7519		-85.526	4.404	1.0464	-24.5784	65.466	2.436	5.0712
		2.2617	-53.9118	-3.4596	-63.6331		-17.9046	46.296	-4.3848	-58.4064	0	105.256	36.7608
		-34.4336	-99.5904	-44.5056	-20.0644		-99.9167	12.4848	0.222	-39.2124	28.7304	6.2316	4.4676
		8.4333	-30.5659	-79.7378	-15.6172			7.0656	5.6052	-32.5812	46.668	26.3004	38.514
		52.0193	-32.4304	-6.161				6.4224	3.8844	-9.7416	44.85	-26.6256	31.0848
		39.9348	-2.0352	-20.6277				40.0872	0	-35.94	-4.7892	-11.4192	28.176
		15.6254	-90.2899	30.1264				1.8756	8.1456	78.7152	21.558	10.23	21.282
		5.2373	100	92.7666				4.8276	12.9192	-32.0412	32.5248	56.9472	28.0176
		-31.2007	28.1076	-13.0504				15.9456	19.6788	-3.3252	20.7396	37.9296	19.8072
		17.6447	-6.1879	-95.2577				10.6764	26.988	14.9424	61.0728	26.6352	24.1284
		-10.8241	66.425	53.6892				-18.7068	15.4692	-29.6328	45.7836	79.4352	2.934
		38.2036	-74.7545	-59.4799				21.792	13.4568	-58.902	59.4312	-19.308	57.7932
		-1.2432	89.6643	-1.3003				-7.2108	45.6828	15.2304	30.4764	-0.5892	-16.5732
		-81.5385	-84.5356	-66.0891				3.9768	2.3928	2.0208	0	27.864	24.2304
		16.4146	99.8069	52.0648				1.3788	120.914	-0.054	34.8036	18.7272	3.5856
		48.3693	20.9949	-46.3386				-5.76	47.5548	20.838	47.7888	1.1784	23.0448
		19.3473	-74.4012	18.6545				0	49.728	3.1896	56.64	-0.75	4.4508
		35.1385	-77.5827	-80.9776				0	31.518	11.652	39.7356	2.0496	-31.0548
		7.1917	24.5738	5.854				0	6.852	19.8672	43.1316	23.9928	21.744
		-3.805	-1.2547	0				0	182.294	16.5576	35.4828	20.7624	35.3892
		-26.1878	51.1813	-17.5226				0	46.1832	-0.9216	65.8104	-0.7728	-15.1536
		15.4048	-34.9717	6.8553				0	152.575	2.8128	1.9572	10.332	2.5116
		-44.1165	-52.7498	-27.2278				0	-34.5312	6.0624	23.25	11.3196	10.5612
		20.7014	-94.6342					-12.438	-42.528	14.3388	7.5888	1.2108	9.8604
		20.4124	93.4263						205.921	1.7364	54.1416	14.2776	15.9624
		89.9498							146.55	15.5748	7.1772	-12.6816	23.4588
		68.2624							88.3488	19.3296	39.7236	13.6272	2.6088
		16.8149							-0.81	8.1588	4.692	13.9104	5.4324
		27.9999							20.1024	39.0324	45.03	40.1724	5.4708
		9.4389							20.4984	15.3288	0.42	-12.5244	-3.2124
		19.3439							103.196	8.1912	42.0168	27.09	7.8924
									79.4064	6.1836	-4.446	5.3508	58.4364
									35.0544			-0.5892	1.3932
									0.39			27.864	6.2412
									52.2252			18.7272	74.4492
									-18.1848			1.1784	4.1556
									43.8756			-0.75	-0.264
									74.526			2.0496	0.4524
									89.184			23.9928	3.0288
									132.655			20.7624	-18.7056
									196.553			-0.7728	-10.4568
									45.984			10.332	-34.6056
									33.3312			11.3196	-14.8032
									-30.4452			1.2108	-1.5924
									60.3504			14.2776	7.554
									54.0012			-12.6816	63.5388
									68.388			13.6272	25.2336
									-28.7148			13.9104	49.4376
									57.6144			40.1724	6.0312
									-21.7464			-12.5244	161.916
									32.7996			27.09	66.7152
									89.6148			5.3508	35.3616
												6.3744	121.247
												17.5608	223.424
												-19.3728	167.664
												13.3188	96.786
												3.0492	-19.302
												7.6884	2.61
												-0.4896	159.55
												16.35	145.787
												21.5964	-18.1812
												-39.9552	73.2564
												-17.5176	181.481
												-5.3412	121.638
												15.834	62.5056
												19.3776	11.9952
												15.0348	62.0016
												-11.022	86.3076
												-1.0128	65.916
												19.794	29.6952
												9.4152	16.014
												9.0036	130.649
												-10.3536	8.8968
												3.7284	31.5912
												0	-2.1372
												0	20.0652
												-0.8568	-10.3308
												0	16.974
												0	21.7824
												0	0.6132
												0	13.3356
												0	46.962
												0	-5.7996
												0	-25.4424
												22.8768	1.92
												9.5916	39.2388
												-9.8292	75.138
												22.6068	3.5064
												-17.8068	64.92
												0	24.1848
												0	49.104
												21.1164	31.5804
													44.88
													5.2932
													-21.6888
													29.1024
													-5.6844
													70.5108
													-5.2236
													3.2892
													22.2792
													26.1564
													51.648
													3.1068
													17.3892
													2.7276
													-1.1808
													4.6332
													12.7104
													44.0196
													38.7432
													1.6776
