# Supplementary material for: Inhibitory muscarinic acetylcholine receptors enhance aversive olfactory learning in adult Drosophila
Source: eLife journal article supplement (doi:10.7554/elife.48264), 2019-06-19
Supplement: supp [file elife-48264-supp-v1.zip › elife_poa_e48264_Figure_2_source_data_1.xlsx]

## Sheet: learning
		RNAi1	247	247>RNA	305	305>RNA	R45H04	R45H04>RNA	R44E04	R44E04>RNA
preference in general		44.8634	48.5337	18.7205	39.4162	38.7157	34.4292	35.4174	42.7222	14.2375
Average		-44.8634	-48.5337	-18.7205	-39.4162	-38.7157	-34.4292	-35.4174	-42.7222	-14.2375
STD		49.742	51.885	34.8655	40.6352	45.3249	29.8897	35.5467	34.5445	35.7844
COUNT		69	41	70	76	69	66	71	50	68
		-12.8674	-35.8149	5.9976	3.5155	0.4624	-11.4623	-3.5013	-21.7042	26.2718
		-39.3727	2.8665	-22.6909	-89.4391	7.7501	-100	-88.85	-46.2749	-8.3422
		0.1546	-97.932	7.7564	-8.5323	76.7534	-27.5185	13.3979	-59.6833	-30.5827
		0	62.8249	-82.2333	-29.4245	-46.9671	9.742	-52.4023	-33.2576	33.1225
		-51.539	17.4216	6.2044	19.0236	-83.4415	10.3174	-12.1991	-68.8205	-79.5567
		-100	18.5709	19.4627	-85.9633	-54.9356	-43.8504	37.8278	-41.5577	-34.1992
		-35.6407	-12.6609	0.5054	100	-80.0048	7.5096	-9.1539	-44.1326	-77.4151
		-89.1627	-98.2484	0.1068	-91.6968	-70.1316	-0.7614	-5.4744	-34.2025	2.5518
		-59.7046	-17.1506	-20.1635	-76.4371	0	-27.1134	-81.9987	-5.4464	-30.0525
		-68.8879	-98.0994	41.5913	-65.7648	-57.3132	-17.8126	-53.7218	-18.4716	-17.6273
		67.6952	1.5114	18.9163	15.2992	-72.0283	-22.9009	-30.135	-32.5926	-9.5362
		-99.9708	-91.7327	-90.5131	-74.6953	-82.4485	-1.0273	19.7396	58.3403	-5.8481
		-89.8943	-94.602	0	-100	-51.7198	-51.6354	9.0792	-66.0358	-28.5714
		-86.2263	-72.9464	-80.3411	6.356	-40.9368	-49.4471	-51.0952	-16.1232	25
		-87.2719	-90.5074	-22.9521	-42.35	85.2833	-78.1659	6.665	31.8529	-20
		-77.6342	-68.0127	0.8944	-14.5684	31.5876	-54.0379	-17.2017	-43.9317	5
		-58.6377	-33.1493	-19.875	-98.9316	-30.3076	-26.4588	-39.1729	14.1176	-13.6364
		-58.3882	-78.3906	-17.9309	-65.2354	-17.6326	-69.1039	-25.9772	-49.784	2.2727
		-48.5981	-84.3551	-87.3692	-4.5215	-56.4275	-100	-86.0398	-74.9784	-37.5
		-89.8737	47.9561	-44.1304	1.3675	24.4007	-20.0951	-85.9891	-43.2029	5
		0.6585	86.9513	-7.9569	-30.6695	-100	-4.0349	31.1463	-100	10.7143
		-100	-73.8419	11.3616	4.0403	100	17.9896	-45.0372	-3.0744	-5.1471
		-20.9728	-95.2883	-8.9686	-99.3208	-20.284	-16.2166	-15.9419	-66.185	0
		-43.5073	-50.839	-2.879	-70.6335	-57.8183	-27.1069	18.0183	-8.1885	-15.8778
		1.6235	-1.9232	-94.6183	4.4289	-99.9758	-52.1417	-79.7133	-39.0003	-42.362
		-91.2516	-98.0626	0.6546	-100	-77.027	-63.4687	-95.2205	-23.9761	13.4345
		-74.9091	-81.5203	-59.9745	-0.6608	-49.6699	2.18	-31.9111	-81.4087	10.0534
		-36.939	-93.8001	5.7352	-86.6061	-83.3956	-30.6345	-43.0788	-56.2192	-52.9154
		19.4359	-97.0541	-24.5533	63.8527	-99.9683	-46.0816	-39.5674	-40.3035	-18.5871
		-91.4385	-94.0688	-20.0522	-32.9501	-54.6416	-53.7417	-43.5409	-47.7033	-30.2397
		-99.3886	-17.5613	-82.5114	2.6011	-57.9649	-46.9807	2.7876	-33.1595	-44.2615
		25.8601	0	21.3254	-50.3811	-98.4962	-48.7307	53.4288	-85.2404	-9.8355
		-26.4311	7.6853	0	2.8651	-79.2021	55.5451	-91.4924	-100	-38.5924
		29.1768	2.5437	-8.5691	-29.8048	-68.8556	-80.1288	-41.5532	-71.9275	76.2266
		96.1492	-92.1088	-42.7432	-98.0289	-72.1186	-7.9814	-90.7203	-93.5808	-5.9643
		-81.7342	-81.7772	-92.4882	-4.4914	-74.044	-27.6642	-42.1599	-2.0819	6.9197
		86.3645	-29.4964	0.3409	-27.0492	-18.9514	-71.5698	-13.6184	-57.635	-13.5595
		-100	-86.583	-23.5541	-88.5325	-56.4303	-54.8425	-46.1289	-63.6697	-19.7533
		0.9319	-99.4319	0.5345	-48.1233	-1.9379	-21.2125	-90.4541	-98.5624	-12.6386
		-100	-100	-88.2012	-71.9697	-98.0704	-33.935	-6.9277	1.5169	1.0769
		3.7256	-71.2536	10.7778	-61.4334	-55.1691	-21.1828	-22.4685	-78.8803	-8.8036
		10.6858		-4.4582	0.1307	-69.2874	-27.5392	-35.8758	-37.6806	-35.8264
		-100		0	-8.0353	-38.0857	-35.9433	-36.7776	-65.7868	10.6102
		-22.6344		-54.3614	-77.3837	-50.8198	-3.2858	-98.2371	-24.7901	-99.8783
		2.5307		-44.5614	-81.2683	-75.0701	-83.807	-84.7326	-53.1798	-96.6322
		-12.6634		11.4057	22.0457	-5.029	-35.3997	-94.9541	-25.6489	12.9978
		-91.5427		-28.2101	0.0635	-71.8461	-36.0041	-10.0698	-98.0356	-23.8763
		-97.8453		-21.8189	-59.624	-92.5009	-10.9185	-0.6892	-4.9657	88.0347
		-94.5457		0	-62.6538	50.6656	-31.7392	-11.661	-11.3245	-37.4361
		-60.0729		2.8785	-54.105	-39.587	-10.3083	9.1748	-69.53	0.965
		-100		2.2484	-33.7946	0.2544	-43.8295	-35.1127		30.2914
		38.3353		4.6196	-31.066	-74.0854	-39.1119	-58.9773		-85.1144
		-0.8407		-51.4938	-62.2778	-97.5196	-49.0568	-17.9672		42.2683
		-97.2967		-6.6827	-26.4349	-39.2689	-32.5489	-32.8319		-21.3806
		-61.0845		47.9112	-28.1728	6.6611	-18.7802	-11.152		-26.5
		-9.4061		-11.669	-17.7402	-43.0591	-67.5254	-37.9261		-68.6773
		-14.6162		-26.7361	-72.5639	-18.9202	-39.1474	-70.7372		-6.9939
		10.4173		-60.0815	-80.1157	-48.1759	-83.6327	-29.2034		14.6302
		-19.791		-19.0916	-70.9533	-30.5423	-10.6612	-40.9635		-7.4841
		-12.0537		-99.92	-24.4212	32.8506	-70.2628	-28.2961		-45.627
		-97.5706		-8.215	-52.9353	-30.2882	7.9408	-57.8673		-2.4213
		-38.9393		25.4618	-100	7.3161	-49.3294	-39.238		-96.3353
		-69.433		14.5203	-41.041	-44.3845	-68.8112	-19.0738		1.9475
		-32.9353		21.4729	-60.2624	-14.1874	-9.3374	-42.5047		-6.2125
		-72.1571		13.3105	-82.6145	-28.6077	-57.8216	-23.9305		-1.1174
		-79.3182		-11.4614	-66.6107	-28.4383	-59.7025	-69.1188		-52.6541
		-93.4863		-34.8131	-44.6972	-86.341		-80.6263		15.3248
		-99.2055		-57.2868	-19.0477	1.5158		-96.9813		22.71
		-91.6412		-13.2949	-54.2827	-2.5208		-19.833
				-7.0056	-62.8437			-22.4557
					-25.2929			-25.6593
					-2.4339
					-13.7747
					1.8286
					-6.763
					-71.6269
