# Supplementary material for: Inhibitory muscarinic acetylcholine receptors enhance aversive olfactory learning in adult Drosophila
Source: eLife journal article supplement (doi:10.7554/elife.48264), 2019-06-19
Supplement: supp [file elife-48264-supp-v1.zip › elife_poa_e48264_Figure_3_source_data_1.csv]

MCH
Control						mAChR-A RNAi
calyx	alpha prime	beta prime	alpha	beta	gamma	calyx	alpha prime	beta prime	alpha	beta	gamma
1.0032	0.5719	0.9757	0.7461	1.3953	1.155		0.7468	0.5786	0.6892	0.8363	0.8537
	1.0982	0.8286	0.7009	1.1792	1.2979		1.3728	1.1894	0.4538	1.1696	1.6431
	0.6161	0.5938	0.6259	0.5145	0.4514		1.4361	0.8363	2.224	1.1397	1.1306
0.435	0.4455	0.5197	0.3807	0.5811	0.4532	1.2801	1.2003	0.8142	2.3608	1.0115	1.1529
		0.8189		0.9235	0.6996		0.9748	1.0876	0.2394	0.8635	1.0067
		0.7805		0.8206	0.9144	0.7029	0.7765	0.8576	0.7988	0.8655	1.2537
1.0291	0.8233	1.0066	0.8745	0.8644	0.912	1.3922	1.1007	1.0399	1.7888	1.3265	1.3787
1.0123	1.159	0.8947	1.1081	0.9331	1.0249		1.0263	1.0989	0.5596	0.9397	1.6782
1.2214	0.677	0.6102	0.7967	0.7348	0.7661	1.1849	0.8442	0.9536	0.9576	0.9426	1.1754
0.7409	0.7501	0.825	0.939	0.9135	1.2153	1.013	0.5889	0.9353	0.7143	0.8771	1.3708
0.7954	0.3968	0.7316	0.4485	0.5459	0.8345	0.7909	0.5974	0.887	0.6245	0.6604	1.1138
0.6331	0.5958	0.6426	0.7895	0.5901	0.8032	0.94	0.5954	0.9748	0.5789	0.653	1.3504
1.0433	0.7316	0.4393	0.5434	0.4188	0.4799	1.0057	1.077	0.9624	0.5702	0.9872	1.2564
0.6769	0.6823	0.5261	0.3913	0.471	0.3496	0.9699	0.9474	0.9642	0.7846	1.155	1.216
0.9118	1.1862	0.8012	1.2177	1.0686	0.8705	1.0617	1.1834	1.0526	1.2907	1.2054	1.3786
0.4483	0.7564	0.75	0.9743	0.8738	0.7692	1.6657	0.9719	0.8396	1.2328	0.8103	1.1231
1.866	1.0578	0.9366	0.994	0.7321	0.9647	1.2399	1.8659	1.5664	1.4796	1.6066	0.9698
1.3049	0.6869	0.8009	0.6679	0.752	0.6663	0.6123	0.8413	0.8112	0.3838	0.5155	0.6536
0.9892		0.7718		0.7466	1.0132	1.4333	0.9995	0.9336	0.693	0.5432	0.956
0.9635	0.8136	0.6423	0.9251	0.6675	0.9527	1.5496	1.1415	1.0494	1.2047	0.7778	1.0482
0.8677	0.7788	0.5397	0.9764	0.5527	0.8511	2.0992	1.0017	0.8174	1.8228	1.0661	1.2851
0.7652	0.9026	0.6656	0.5861	0.6567	0.8974	1.9024	1.0396	1.074	1.2319	0.7362	1.1215
0.7022	0.9748	0.7725	0.516	0.6422	0.798
0.7568	1.1303	0.8739	0.8531	0.6251	0.9567
1.3198	1.0605	0.7868	0.3451	0.749	0.8143
1.4431	1.0928	0.9792	1.0852	0.9866	0.8744
1.0844	0.9529	0.7462	1.0132	0.7823	0.7808
OCT
Control						mAChR-A RNAi
calyx	alpha prime	beta prime	alpha	beta	gamma	calyx	alpha prime	beta prime	alpha	beta	gamma
1.3345	0.7286	1.0708	0.7827	0.7761	1.1284		0.75	0.5923	0.5481	0.8154	0.8045
	1.2687	1.096	0.7656	1.3732	1.3224		1.5229	1.3222	0.5312	1.357	1.6781
	0.4181	0.6444	0.7565	0.5252	0.4305			1.0433		1.2179	1.42
0.5705	0.5004	0.567	0.3712	0.6388	0.3955	1.7341		0.7493		0.9171	1.1406
		0.7068		1.1738	0.5804		1.0881	1.0387	0.4283	0.8888	1.1215
		1.0605		0.8544	0.8625	1.3617	1.112	1.0116	0.9801	1.0279	1.5553
1.3207	0.8195	0.9258	0.383	0.8459	0.8194	1.6363	0.7748	0.948	1.0597	1.4764	1.4543
1.2401	0.9342	0.9336	0.6715	0.8188	0.9264		0.8576	1.1028	0.9213	1.4336	1.6615
1.0503	0.8115	0.77	0.8567	1.1185	0.9661	1.3976	0.9135	0.9423	0.9727	1.2714	1.4983
0.9031	0.9056	0.9168	0.8357	1.3013	1.405	1.3462	0.7808	0.8498	0.8824	1.3343	1.6598
0.9806	0.7099	0.9714	0.9945	1.049	0.8906	1.3175	0.3601	0.6346	0.3952	0.6737	0.8113
0.835	0.9712	0.7719	1.1661	0.9835	1.1	1.2485	0.4614	0.7344	0.4462	0.5969	0.9421
1.2475	0.803	0.6685	0.539	0.515	0.5487	0.8894	0.6751	0.8925	0.3332	0.7967	1.1841
1.0362	0.6332	0.6149	0.3614	0.5763	0.3513	0.6352	0.5426	0.8533	0.5123	0.6984	1.0571
1.3201	1.2204	1.4057	1.3926	2.0033	1.5208	3.0034	1.2006	0.824	1.1056	1.1096	1.2399
0.7274	1.0255	1.1378	1.206	1.5334	1.3546	1.625	0.9955	0.7109	0.9786	0.729	1.0056
1.9743	0.7817	0.7677	0.7949	0.8947	0.6043	1.7211	2.1294	1.4933	1.7592	1.4403	0.9306
1.2416	0.9407	0.5847	0.7717	0.8352	0.662	0.8737	1.4823	1.2256	0.5481	1.0473	0.9888
1.0122		0.7373		0.8515	0.6906	2.2787	1.0349	0.9472	1.1333	1.0117	1.0798
1.3675	0.9738	0.8624	0.9344	0.8655	0.7296	2.6402	1.1315	1.1212	1.5451	1.3144	1.2501
1.2916	0.6809	0.6482	0.9691	0.7326	0.7969	2.8809	1.3733	0.497	1.9494	1.685	1.7619
0.9299	1.2198	0.7244	0.8079	0.7641	1.0911	2.5689	0.9648	0.7934	1.7494	1.6973	1.2542
0.856	1.1064	0.7111	0.6525	0.5803	0.628
1.0953	1.3966	1.0774	0.9659	0.624	0.8221
1.4687	0.8582	0.8785	0.2029	0.5595	0.7132
1.6037	1.2192	1.0522	1.1353	0.8655	0.9549
1.1927	0.9225	0.7585	1.2184	0.7293	0.7793
Note: rows within each group represent data from the same fly
