# Supplementary material for: Inhibitory muscarinic acetylcholine receptors enhance aversive olfactory learning in adult Drosophila
Source: eLife journal article supplement (doi:10.7554/elife.48264), 2019-06-19
Supplement: supp [file elife-48264-supp-v1.zip › elife_poa_e48264_Figure_4_source_data_1.csv]

Figure 4B (sparseness)
Control		mAChR-A RNAi
MCH	OCT	MCH	OCT
0.93651	0.8771515	0.8349895	0.8521838
0.8674725	0.8776972	0.9411201	0.8207138
0.9080934	0.8656428	0.9854066	0.8879496
0.9473959	0.8973332	0.9710153	0.9286671
0.969638	0.9434984	0.9463915	0.9331627
0.9321624	0.9337926	0.9325422	0.9034068
0.9600742	0.9429809	0.9884784	0.8745567
0.958284	0.8983062	0.9787527	0.9585527
0.9259181	0.879736	0.9639676	0.948516
0.9087089	0.8138517	0.8931361	0.8965832
0.9190699	0.87586	0.9096739	0.9142539
0.9031832	0.8637505
Figure 4C (correlation)
Control	mAChR-A RNAi
0.1802712	0.1725524
0.2222334	0.2834958
0.235926	0.09790812
0.2334665	0.1900638
0.2964023	0.2961477
0.254196	0.2677158
0.2795796	0.107122
0.2599381	0.2846615
0.2511775	0.2211567
0.06198282	0.2024466
0.3563254	0.3310936
0.1654606
Figure 4F
Control				mAChR-A
calyx		gamma lobe		calyx		gamma lobe
MCH	OCT	MCH	OCT	MCH	OCT	MCH	OCT
1.1322	0.6255	1.0792	1.1374	1.1519	1.576	0.7903	1.4798
0.6347	0.7238	0.8792	0.7967	0.6611	1.205	0.8805	1.6769
0.2232	0.276	0.98	0.5459	1.385	1.3084	0.8235	1.2583
0.4812	0.3733	1.1259	0.7865	1.2953	1.4123	0.8439	1.0398
1.2058	0.8754	1.2436	0.6923	1.7628	1.2853	0.7828	0.6923
1.0316	0.8474	1.1075	0.5268	1.2438	1.2946	0.869	0.7138
1.0232	1.0271	0.7772	0.6241	1.4965	2.0424	0.6325	1.2464
0.6852	0.5828	0.6987	0.7531	1.1194	1.8424	0.5956	1.0237
0.5008	0.7247	0.6572	0.7855	0.2833	0.8305	0.5418	1.1519
0.5965	0.8058	0.2959	0.6868	1.112	1.4058	0.5795	1.2079
1.4579	1.9804	0.5624	0.9096	1.1093	0.8426	1.9624	1.8162
				1.6814	1.4574	1.4039	0.5771
Figure 4H
Control		mAChR-A RNAi
MCH	OCT	MCH	OCT
0.9448324	0.9615614	0.9547912	0.9462887
0.9319856	0.8910138	0.970781	0.9593781
0.9956555	0.990292	0.9727242	0.9548082
0.9884802	0.9840497	0.9571561	0.958332
0.8845748	0.9935326	0.9404583	0.9563254
0.9767448	0.9856344	0.9353927	0.9500927
0.9883425	0.9926991	0.9557622	0.9423085
0.9741158	0.9530174	0.9234894	0.9211709
0.9690635	0.974242	0.9356576	0.9058739
0.9503713	0.9671423	0.9979497	0.9442343
0.9502313	0.9329684	0.9899425	0.9821317
0.9859739	0.9757046	0.9876208	0.9965315
Figure 4I
Control	mAChR-A RNAi
0.2241815	0.2000866
0.5151533	0.1091205
0.2269598	0.04519
0.06600372	0.2261473
-0.01194984	0.01573754
0.2490356	0.1767361
-0.009377134	0.1329848
0.05895055	0.1198669
0.1112208	0.3239311
0.09058905	-0.01112225
0.5166281	0.1568462
0.3290746	0.1507431
