# Supplementary material for: Inhibitory muscarinic acetylcholine receptors enhance aversive olfactory learning in adult Drosophila
Source: eLife journal article supplement (doi:10.7554/elife.48264), 2019-06-19
Supplement: supp [file elife-48264-supp-v1.zip › elife_poa_e48264_Figure_5_source_data_1.csv]

Figure 5B
MCH
before						after adding muscarine
calyx	alpha prime	beta prime	alpha	beta	gamma	calyx	alpha prime	beta prime	alpha	beta	gamma
0.4159	0.5142	0.443	0.5037	0.4118	0.4999	0.2183	0.1523	0.1662	0.1304	0.08761	0.07156
0.4812	0.7568	0.8341	0.555	0.4275	0.778	0.2139	0.07458	0.1879	0.1752	0.07681	0.0803
1.1501	0.694	0.7274	1.2122	0.7672	1.0979	0.7021	0.3578	0.4782	0.4286	0.8091	0.3083
0.6101	1.2166	0.9209	0.7469	0.8303	0.6653	0.3789	0.3787	0.2643	0.113	0.2415	0.2355
0.5129	1.4052	0.9513	1.6746	1.4149	0.8643	0.4923	0.4744	0.3882	0.3308	0.5688	0.4044
0.5967	0.3937	0.6927	0.7309	0.3819	0.6643	0.6342	0.3374	0.5091	0.4551	0.5209	0.332
0.595	0.8665	0.7077	0.9973	0.5477	0.8388	0.4593	0.61	0.4893	0.4877	0.4957	0.3893
0.4607	1.1021	1.2644	0.368	0.5054	0.1729	0.3036	0.3452	0.1972	0.1496	0.1475	0.124
0.4411	0.7931	1.1665	0.3169	0.7348	0.5106	0.26	0.3913	0.1891	0.1422	0.2274	0.06445
0.4747	0.3229	0.3282	0.4666	0.4171	0.4747	0.3533	0.1558	0.2253	0.2087	0.4766	0.2478
0.4892	0.4511	0.3796	0.5334	0.5817	0.5427	0.3484	0.3064	0.2545	0.3879	0.4979	0.2711
OCT
before						after adding muscarine
calyx	alpha prime	beta prime	alpha	beta	gamma	calyx	alpha prime	beta prime	alpha	beta	gamma
0.91425	0.6946	0.5128	0.70765	0.85075	0.6195	0.298	0.2016	0.325	0.1018	0.1189	0.19
0.77345	1.15995	0.7025	0.8969	0.75795	0.83915	0.2712	0.2544	0.3143	0.1822	0.1474	0.1025
0.9332	0.6417	0.3348	0.6725	0.6917	0.6246	1.0227	0.851	0.3997	0.7402	0.8805	0.7434
0.9844	1.8278	0.937	1.0078	0.9758	0.7469	0.4998	0.7229	0.5311	0.3029	0.3875	0.2032
0.804	0.8963	0.8096	0.9437	0.8415	0.6337	0.5577	0.6151	0.2895	0.3194	0.3652	0.2256
0.834	0.636	0.6438	0.7424	0.588	0.6381	0.4051	0.3234	0.5031	0.6267	0.2682	0.8746
0.683	0.9258	0.729	1.0358	0.7165	0.6581	0.5893	0.5199	0.3072	0.3466	0.3986	0.3498
1.2635	1.4535	2.4647	0.5654	1.0279	0.2789	0.4639	0.4975	0.218	0.2525	0.3061	0.1304
1.0806	1.5842	2.0635	0.5826	1.4749	1.0799	0.4734	0.6243	0.3723	0.2489	0.3045	0.221
0.8549	0.5389	0.4206	0.8417	0.5969	0.6335	0.6659	0.3021	0.3215	0.4939	0.4474	0.4006
1.0687	0.8523	0.5151	1.0712	0.8112	0.6749	0.5321	0.6822	0.389	0.5308	0.489	0.4012
Figure 5C
MCH		OCT
before	after adding muscarine	before	after adding muscarine
1.59	1.9295	1.8346	2.3006
2.4516	2.4504	2.2166	1.2947
2.2729	1.8673	1.8759	2.9
1.44	0.457	1.5785	1.5785
2.5659	1.4694	1.6873	1.6873
Figure 5D
APL unlabeled
MCH
before						after adding muscarine
calyx	alpha prime	beta prime	alpha	beta	gamma	calyx	alpha prime	beta prime	alpha	beta	gamma
1.3442	0.8104	0.8074	1.2539	0.9133	0.622	0.784	0.5621	0.4105	0.3951	0.3962	0.2424
1.6308	0.9664	0.9326	1.2385	1.3084	1.0619	0.572	0.3305	0.2945	0.262	0.3528	0.235
1.7261	1.3993	0.9589	1.4661	1.0315	1.4929	0.6091	0.5707	0.3862	0.2712	0.505	0.2977
0.4079	0.9853	1.0048	0.3266	0.6406	0.7969	0.19925	0.29715	0.2437	0.24006	0.28885	0.21975
2.216	0.888	0.9352	2.3358	2.3834	0.6023	1.1113	0.5079	0.5037	1.0176	0.8322	0.2125
1.1996	0.548995	1.00815	0.18706	0.55515	0.7083	0.6679	0.7862	0.5033	0.1185	0.509	0.1369
OCT
before						after adding muscarine
calyx	alpha prime	beta prime	alpha	beta	gamma	calyx	alpha prime	beta prime	alpha	beta	gamma
1.2232	1.0101	0.7047	0.7763	0.6178	0.5367	0.8716	0.5496	0.7223	0.5088	0.5477	0.4347
1.4265	1.0308	0.8501	0.9212	1.1563	0.9111	0.6456	0.2856	0.3966	0.217	0.3299	0.1978
2.387	1.5583	1.2816	1.9593	2.2871	1.4332	0.6624	0.4908	0.3773	0.2301	0.4714	0.2851
0.4016	0.6328	0.9102	0.3255	0.5179	0.7849	0.5511	0.99245	0.87595	0.4737	0.6215	0.92675
1.6968	0.7067	0.8261	1.479	1.4198	0.5497	0.9451	0.636	0.6562	0.6016	0.6064	0.4402
1.64595	1.6039	1.01375	0.5395	0.84055	0.86875	0.9535	0.736	0.5763	0.4099	0.5996	0.1431
APL>TNT
MCH
before						after adding muscarine
calyx	alpha prime	beta prime	alpha	beta	gamma	calyx	alpha prime	beta prime	alpha	beta	gamma
2.2466	3.5714	2.4643	1.6205	2.1862	3.8019	1.5207	1.3801	1.1807	0.6602	0.967	1.808
1.7514	2.9216	2.4899	1.3327	1.817	2.1752	1.4442	1.6688	1.256	1.0896	1.0617	1.61
1.9539	3.1226	2.7651	1.4624	1.8254	1.6198	1.4936	1.5989	1.2272	0.6687	0.9948	1.3089
1.0316	2.4423	1.9929	0.7132	1.1138	1.7703	0.82585	0.7536	0.70345	0.23575	0.50775	0.9359
3.878	2.1897	1.7971	3.7899	2.7566	2.6083	1.8069	1.1195	1.0405	1.0298	1.178	1.1307
1.21775	2.5598	2.34575	0.5432	1.2638	1.3055	1.1799	1.0101	0.8973	0.9012	1.1921	1.202
APL>TNT
OCT
before						after adding muscarine
calyx	alpha prime	beta prime	alpha	beta	gamma	calyx	alpha prime	beta prime	alpha	beta	gamma
2.2209	3.9516	2.6561	1.7138	2.3074	3.1797	1.7708	1.9863	1.4174	0.6358	1.052	2.0136
3.2206	5.3682	3.5165	2.687	3.3202	1.9357	2.0837	2.2874	1.5945	0.8699	1.7086	1.6807
2.5487	3.9412	2.9303	2.1114	2.8577	2.684	1.6124	1.9422	1.4196	0.9731	1.1526	1.7604
2.3145	3.3911	2.6994	1.3638	2.0169	2.5097	1.49955	2.0986	1.384	0.4904	0.78585	1.43745
3.3478	2.1912	1.7486	2.9277	2.2013	2.4201	1.8658	1.2993	1.1879	0.9596	0.9975	1.4091
2.83595	4.35285	2.58105	2.2328	2.0792	2.0528	1.8174	1.5226	1.0556	1.5216	1.5448	1.4767
Note: rows within each category represent measurements from the same fly
Data in Figure 5E are derived from 5D as (response with muscarine)/(response before muscarine)
