# Supplementary material for: Inhibitory muscarinic acetylcholine receptors enhance aversive olfactory learning in adult Drosophila
Source: eLife journal article supplement (doi:10.7554/elife.48264), 2019-06-19
Supplement: supp [file elife-48264-supp-v1.zip › elife_poa_e48264_Figure_6_source_data_1.csv]

Figure 6C
	calyx	alpha prime	beta prime	alpha	beta	gamma
	0.152164	-0.09792	-0.064196	0.21612	-0.04396	0.146646
	0.0391034	0.0265284	-0.11462	0.057846	-0.012348	-0.004482
	0.137006	0.0177225	-0.034602	0.257758	0.214048	0.084188
	0.080328	0.0780914	0.0561978	0.19466	0.0634238	-0.082572
	0.187648	0.000264	0.06671	0.155784	0.035116	0.076128
	-0.0008438	-0.12348	-0.0447816	0.01192	-0.057832	0.0639402
	0.121449	-0.0104576	0.0100036	0.1274	0.0221134	0.130576
Figure 6E
	OCT same side
	Before (3-octanol without muscarine)						After (3-octanol+muscarine)
	calyx	alpha prime	beta prime	alpha	beta	gamma	calyx	alpha prime	beta prime	alpha	beta	gamma
	0.1309842	0.18231112	0.2254152	0.26357824	0.19393958	0.25611952	0.23363505	0.073113985	0.083425671	0.27072644	0.17011128	0.27740419
	0.32522199	0.054992788	0.23923138	0.12309518	0.24859762	0.20461586	0.16804509	0.000501	-0.010390284	0.14533775	0.001850944	0.083641984
	0.28978649	0.19177873	0.19753179	0.25711086	0.23425351	0.043929249	0.17088519	0.15568505	0.13097182	0.4235554	0.13534994	0.11594883
	0.25948754	0.31565398	0.34917498	0.33851919	0.41821042	0.11001689	0.16164434	-0.020672502	0.025496881	0.17748338	0.037053961	-0.065733947
	0.30680001	0.43709999	0.39030001	0.24699999	0.28470001	0.1567	0.32339999	0.053339999	0.052979998	0.2525	0.020819999	0.1135
	0.52289999	0.51090002	0.52969998	0.33230001	0.35030001	0.29480001	0.46599999	0.2933	0.29609999	0.2034	0.2089	0.25060001
	0.54500002	0.56199998	0.49540001	0.18430001	0.2854	0.3035	0.5	0.069289997	0.112	0.1979	0.1726	0.07401
	0.22679999	0.3039	0.29899999	0.1167	0.1561	0.30019999	0.1367	0.075819999	0.197	0.1195	0.1209	0.1855
	0.29609999	0.54799998	0.4249	0.30579999	0.37419999	0.36219999	0.32139999	0.18189999	0.1507	0.1813	0.1003	0.2061
	MCH same side
	Before (MCH without muscarine)						After (MCH+muscarine)
	calyx	alpha prime	beta prime	alpha	beta	gamma	calyx	alpha prime	beta prime	alpha	beta	gamma
	0.14105973	0.18605816	0.18099366	0.13015358	0.23528996	0.27566409	0.17635325	0.044475418	0.14426304	0.41156727	0.18991986	0.47814226
	0.27815801	0.10996239	0.19210993	0.081037991	0.17930901	0.12293243	0.11855201	0.14153574	0.041921169	0.086792864	0.06898506	0.13062
	0.24370219	0.14518896	0.10030076	0.3900125	0.12299065	0.20494856	0.15914634	0.050823942	0.15697587	0.21631545	0.096906625	0.1608064
	0.37220001	0.32859999	0.2701	0.2832	0.175	0.091420002	0.329	-0.1016	-0.02414	0.149	-0.076779999	0.1231
	0.48789999	0.54149997	0.46169999	0.3224	0.54820001	0.55790001	0.50599998	0.30809999	0.33750001	0.15109999	0.2825	0.1003
	0.36160001	0.40889999	0.48010001	0.20900001	0.2027	0.23450001	0.5528	0.19410001	0.25560001	0.1233	0.1172	0.1002
	0.27829999	0.2344	0.1881	0.2124	0.2017	0.2431	0.090800002	0.057890002	0.098130003	0.14399999	0.028310001	0.052480001
	OCT opposite side
	Before (3-octanol without muscarine)						After (3-octanol+muscarine)
	calyx	alpha prime	beta prime	alpha	beta	gamma	calyx	alpha prime	beta prime	alpha	beta	gamma
	0.21896183	0.28942052	0.34662199	0.14459635	0.19892426	0.34147456	0.25963616	0.30446512	0.39642787	0.36771065	0.33932361	0.66185093
	0.44273686	0.3367579	0.29458854	0.26952854	0.34294289	0.21902221	0.58100146	0.32194069	0.31972656	0.26382715	0.18609798	0.35831231
	0.47183454	0.3558366	0.38564286	0.39171001	0.12942924	0.39283514	0.31675917	0.21739994	0.20856781	0.73291576	0.49443564	0.34781596
	0.2728	0.53280002	0.2476	0.26930001	0.20469999	0.20460001	0.28549999	0.5334	0.3603	0.34169999	0.33590001	0.19580001
	0.42879999	0.3784	0.52740002	0.25350001	0.2307	0.2489	0.4093	0.2924	0.33399999	0.1987	0.31200001	0.2036
	0.30770001	0.58060002	0.52749997	0.32699999	0.43180001	0.33219999	0.2274	0.65429997	0.41839999	0.31600001	0.36219999	0.33019999
	0.22660001	0.1015	0.19159999	0.094959997	0.1718	0.2287	0.27579999	0.2854	0.28310001	0.1548	0.205	0.2401
	0.1246	0.36919999	0.2281	0.13169999	0.1644	0.2313	0.16410001	0.22139999	0.13339999	0.1287	0.12800001	0.13789999
	MCH opposite side
	Before (MCH without muscarine)						After (MCH+muscarine)
	calyx	alpha prime	beta prime	alpha	beta	gamma	calyx	alpha prime	beta prime	alpha	beta	gamma
	0.18829355	0.35926184	0.24940793	0.1641041	0.29785323	0.39890152	0.12068782	0.16954193	0.13302602	0.16251783	-0.015080632	0.22961161
	0.3137548	0.18887064	0.21792912	0.2240389	0.21540102	0.23513092	0.34725797	0.18768293	0.17397772	0.17755421	0.1454917	0.25188228
	0.1926	0.26480001	0.16069999	0.26429999	0.1344	0.1172	0.1532	0.31580001	0.25459999	0.1767	0.097900003	0.19069999
	0.47	0.41429999	0.38350001	0.30489999	0.34419999	0.43290001	0.33149999	0.3527	0.3292	0.24510001	0.3105	0.164
	0.2121	0.3057	0.39840001	0.1936	0.38319999	0.3249	0.2726	0.50199997	0.48359999	0.32159999	0.25670001	0.3364
	0.20900001	0.1609	0.18719999	0.22239999	0.2024	0.1778	0.21870001	0.1601	0.1375	0.18619999	0.1238	0.2158
	0.104	0.1269	0.1287	0.055679999	0.13079999	0.1354	0.083059996	0.1612	0.1138	0.088160001	0.138	0.211
