# Supplementary material for: Inhibitory muscarinic acetylcholine receptors enhance aversive olfactory learning in adult Drosophila
Source: eLife journal article supplement (doi:10.7554/elife.48264), 2019-06-19
Supplement: supp [file elife-48264-supp-v1.zip › elife_poa_e48264_Figure_7_source_data_1.xlsx]

## Sheet: Sheet1
experiment 1
			DM1				EF1
						average				average	deltaCT	ddCT	RQ
	7	7a gal4	24.6458	24.5646	24.4737	24.5613	21.7503	21.7083	21.9689	21.8092	2.75216	-0.46289	1.3783
	8	7b gal4	24.4244	24.7094	24.6029	24.5789	21.8838	21.9852	22.2602	22.043	2.53589	-0.679164	1.60121
	9	7c gal4	24.811	24.4151	24.4674	24.5645	22.1015	21.7132	22.0136	21.9428	2.62171	-0.59334	1.50874
	10	7d gal4	25.2263	25.1062	25.2309	25.1878	22.2118	22.2152	22.3886	22.2719	2.91594	-0.299119	1.23039
	13	59216	28.6679	28.4377	28.4663	28.524	21.8741	21.9849	22.2849	22.048	6.47598	3.26093	0.104319
	2	W1118	24.8676	24.8174	24.7403	24.8084	21.9737	21.9713	21.9638	21.9696	2.83885	-0.376202	1.29792			w1118 average
																3.21505
experiment 2
			DM1				EF1
						average				average	deltaCT	ddCT	RQ
	1	W1118A	26.9774	26.8216	26.7976	26.8655	23.8433	23.662	23.5199	23.6751	3.19047	-0.0245859	1.01719
	2	W1118B	26.3869	26.5527	26.7557	26.5651	23.059	23.2077	23.1424	23.1364	3.42874	0.213688	0.86233
	3	59216A	29.9946	29.6237	29.649	29.7558	22.3951	22.6531	22.4004	22.4828	7.27292	4.05787	0.0600427
	4	59216B	28.265	28.4018	28.3624	28.3431	21.3111	21.6209	21.6675	21.5331	6.80995	3.59489	0.0827618
experiment 3
	6	W1118	28.6542	28.3814	28.7955	28.6103	25.114	25.0855	25.425	25.2082	3.40215	0.187099	0.87837
	7	59216	33.6654	33.6784	34.0019	33.7819	25.9621	25.9737	25.7575	25.8978	7.88413	4.66907	0.0393069
