# Supplementary material for: Inhibitory muscarinic acetylcholine receptors enhance aversive olfactory learning in adult Drosophila
Source: eLife journal article supplement (doi:10.7554/elife.48264), 2019-06-19
Supplement: supp [file elife-48264-supp-v1.zip › elife_poa_e48264_Figure_7_source_data_2.xlsx]

## Sheet: learning
		mimic stop	mimic stop 247	mimic stop UAS mAChR-A	mimic stop 247 UAS mAChR-A
		no shock
preference in general		12.712	11.2812	8.73733	34.6503
Average		-12.712	-11.2812	-8.73733	-34.6503
STD		35.6221	44.7191	39.2957	31.1233
COUNT		49	70	56	47
		0.1958	-45.8179	21.8208	-48.0735
		27.8484	58.6369	-85.2943	-72.0306
		3.6077	1.47	-0.1647	3.9494
		-22.3691	-48.068	-17.5693	-81.1996
		19.2938	15.6432	-35.3406	-50.7011
		15.9433	-46.0332	59.1033	-16.7987
		-48.4734	18.9707	98.7414	0.7596
		-10.4587	-23.0643	7.8074	-100
		3.7991	-20.501	-15.7181	-2.1144
		0.153	93.568	8.3693	-23.6897
		-1.8096	-27.8519	-78.8211	1.5059
		-14.8222	-60.1852	41.3595	-86.4755
		-22.9192	2.7816	-52.0664	-53.4526
		-62.8273	-2.4767	-7.4339	-34.4116
		-44.6594	11.6299	11.7136	-59.8864
		-10.7407	-69.9612	-30.2147	-65.1756
		9.5681	-18.1706	-18.1474	-21.8777
		25.6754	-95.0096	-21.7237	-0.9953
		49.105	3.8046	-40.8791	0
		-42.2027	-79.7247	-66.0904	-49.7149
		-5.4727	-100	33.4719	-23.2864
		43.5238	-46.3574	4.7604	-72.0021
		-29.8866	-20.4203	20.0315	-70.7487
		18.749	5.1067	16.0123	-48.3485
		-6.2276	-31.314	7.1798	-1.9531
		-27.3629	-36.8909	-88.1728	13.1468
		-78.4727	-20.297	-7.2607	-96.7596
		-5.5557	0.1625	7.0756	-2.4375
		-20.8097	-2.6953	3.5085	-40.7561
		-1.1874	-14.0501	-17.341	16.4528
		-11.7189	-35.5368	-45.1051	-25.7637
		-7.917	79.0643	1.6359	-47.8262
		-10.9054	-37.8271	-9.4665	-23.174
		-47.1958	5.685	-0.4153	-23.7034
		8.0655	64.8902	-20.7896	-61.723
		-44.4861	-42.1696	-94.029	-11.0042
		12.1209	-68.1962	-11.2977	-14.5039
		-26.9457	-62.5234	4.3331	-58.2742
		10.9016	-79.8125	24.7185	-40.3961
		-1.2475	73.4637	54.2712	-5.1585
		-51.0939	-76.4814	-3.8609	13.6385
		-61.0156	-4.0093	-45.1102	-62.3208
		-55.0902	23.3519	7.1923	-1.3208
		61.8379	61.0978	-46.0684	-17.2509
		-71.7282	41.8624	-5.6005	-45.4758
		72.112	72.6593	-31.7228	-63.774
		-5.3863	-51.3081	-5.4663	-53.4573
		-100	24.5111	-89.9244
		-54.4018	-22.0613	62.4625
			-27.0662	12.0044
			-31.0094	-60.667
			-36.2212	0.0002
			6.3096	0
			0.057	1.2633
			23.7026	28.137
			-81.4009	25.4977
			-44.5901
			-5.78
			-17.2551
			11.3955
			46.4064
			44.4532
			-47.671
			-7.1145
			-66.4849
			14.8605
			66.6078
			-27.267
			26.3095
			-7.4701
