# Supplementary material for: Inhibitory muscarinic acetylcholine receptors enhance aversive olfactory learning in adult Drosophila
Source: eLife journal article supplement (doi:10.7554/elife.48264), 2019-06-19
Supplement: supp [file elife-48264-supp-v1.zip › elife_poa_e48264_Figure_8_source_data_1.xlsx]

## Sheet: learning
		Control oct	Control mch	Control IAA	Control oct	Control mch	Control IAA	RNAi oct	RNAi mch	RNAi IAA	RNAi oct	RNAi mch	RNAi IAA
		mock	mock	mock	trained	trained	trained	mock	mock	mock	trained	trained	trained
DF/F		2.1605	1.94254	1.76343	2.00843	1.01151	2.34363	2.58514	2.7008	3.03978	2.72778	2.31617	2.48893
Average		2.1605	1.94254	1.76343	2.00843	1.01151	2.34363	2.58514	2.7008	3.03978	2.72778	2.31617	2.48893
STD		1.38134	1.24218	1.21443	0.978306	0.870768	1.0759	1.41099	1.57825	2.25561	0.750626	0.567239	0.971156
COUNT		5	5	4	6	5	6	6	6	5	5	5	5
		0.554715	0.696193	0.570622	2.93452	0.251288	3.13636	1.81914	1.9117	2.39916	3.63828	2.80654	3.91794
		0.781754	0.693789	0.942244	2.99064	2.16288	3.7692	0.359556	0.395821	0.404945	2.66941	2.71396	2.86746
		2.91051	2.5746	2.3836	2.76648	1.71976	2.67177	2.79796	2.36899	2.30967	3.0228	2.42501	1.97547
		3.06121	2.19425	3.15725	1.18206		1.71714	4.60542	3.75598	3.55208	2.73572	2.25327	2.33499
		3.49434	3.5539		1.16807	0.569935	0.757593	2.96456	2.77145		1.57268	1.38208	1.3488
					1.00879	0.353668	2.00973	2.96422	5.00086	6.53303
